# Supplementary material for: Novel Antibody-Drug-Conjugates in Routine Clinical Practice for the Treatment of Metastatic Breast Cancer: Adherence, Efficacy and Tolerability – Real-World Data from German Breast Centers
Source: PubMed Central journal article supplement — Geburtshilfe Frauenheilkd. 2024 Sep 2;84(9):855–65. doi: 10.1055/a-2375-5194 (PMC11368468; doi:10.1055/a-2375-5194), 2024-09-02
Supplement: 10-1055-a-2375-5194_23768849.pdf.pdf [file 10-1055-a-2375-5194_23768849.pdf.pdf]

## Supplementary Material

### Appendix

**Suppl. Table 1: Distribution of Patients with SG Therapy at Data Cutoff**

|                                   | SG total        | TNBC             | HR+/HER2-       |
|-----------------------------------|-----------------|------------------|-----------------|
| <b>n (%)</b>                      | <b>48 (100)</b> | <b>43 (89.6)</b> | <b>5 (10.4)</b> |
| <b>Ongoing therapy (%)</b>        | 11 (22.9)       | 8 (18.6)         | 3 (60.0)        |
| <b>Discontinuation of therapy</b> | 37 (77.1)       | 35 (81.4)        | 2 (40.0)        |
| <b>due to progress</b>            | 26 (54.2)       | 25 (58.1)        | 1 (20.0)        |
| <b>due to death</b>               | 4 (8.3)         | 4 (9.3)          | 0 (0)           |
| <b>du to TEAEs</b>                | 2 (4.2)         | 1 (2.3)          | 1 (20.0)        |
| <b>at patient's request</b>       | 3 (6.3)         | 3 (7.0)          | 0 (0)           |
| <b>n/a</b>                        | 2 (4.2)         | 2 (2.3)          | 0 (0)           |
| <b>Deceased (%)</b>               | 20 (41.7%)      | 19 (44.2)        | 1 (20%)         |

Suppl. Table 1 –Distribution of Patients under SG Therapy at Data Cutoff: TEAEs: Treatment-emergent adverse events; n/a: not available.

**Suppl. Table 2: Distribution of Patients with T-DXd Therapy at Data Cutoff**

|                                   | T-DXd total     | HER2+            | Her2-low         |
|-----------------------------------|-----------------|------------------|------------------|
| <b>n (%)</b>                      | <b>77 (100)</b> | <b>41 (53.2)</b> | <b>36 (46.8)</b> |
| <b>Ongoing therapy (%)</b>        | 32 (41.6)       | 19 (46.3)        | 13 (36.1)        |
| <b>Discontinuation of therapy</b> | 45 (58.4)       | 22 (53.7)        | 23 (63.9)        |
| <b>due to progress</b>            | 30 (39.0)       | 16 (39.0)        | 14 (38.9)        |
| <b>due to death</b>               | 2 (2.6)         | 0 (0)            | 2 (5.6)          |
| <b>du to TEAEs</b>                | 10 (13.0)       | 6 (14.6)         | 4 (11.1)         |
| <b>at patient's request</b>       | 2 (2.6)         | 0 (0)            | 2 (5.6)          |
| <b>n/a</b>                        | 1 (1.3)         | 0 (0)            | 1 (2.8)          |
| <b>Deceased (%)</b>               | 22 (28.6)       | 12 (29.3)        | 10 (27.8)        |

Suppl. Table 2 –Distribution of Patients under T-DXd Therapy at Data Cutoff: TEAEs: Treatment-emergent adverse events; n/a: not available.

Supplementary Material

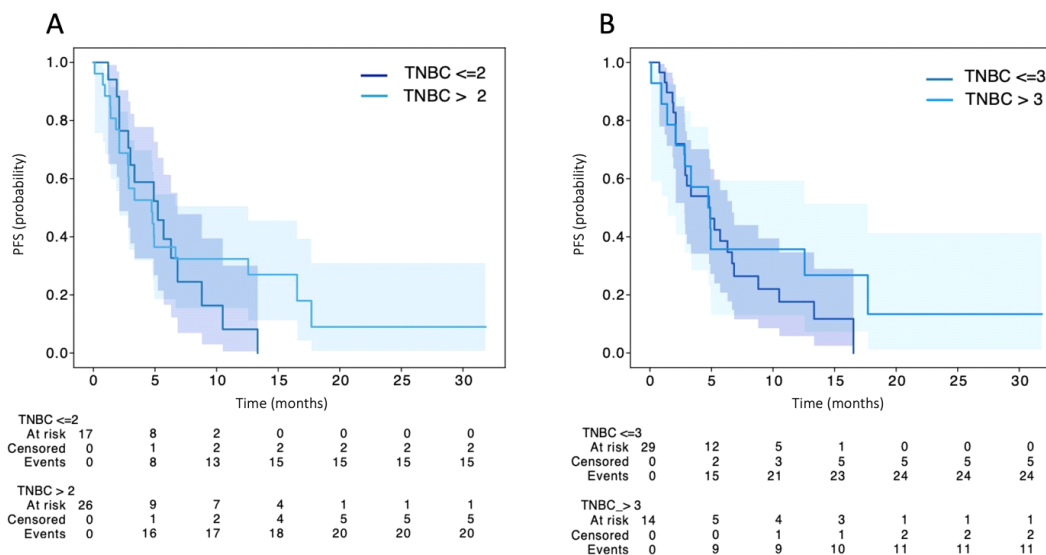

**Suppl. Figure 1 –Real-world progression-free survival with SG therapy stratified by therapy line:** Panel A illustrates the rwPFS of all patients treated with SG segregated into those who received two or fewer prior therapies in the metastatic setting and those who received more than two prior therapies in the metastatic setting. Panel B illustrates the rwPFS of all patients treated with SG segregated into those who received three or fewer prior therapies in the metastatic setting and those who received more than three prior therapies in the metastatic setting.

Supplementary Material

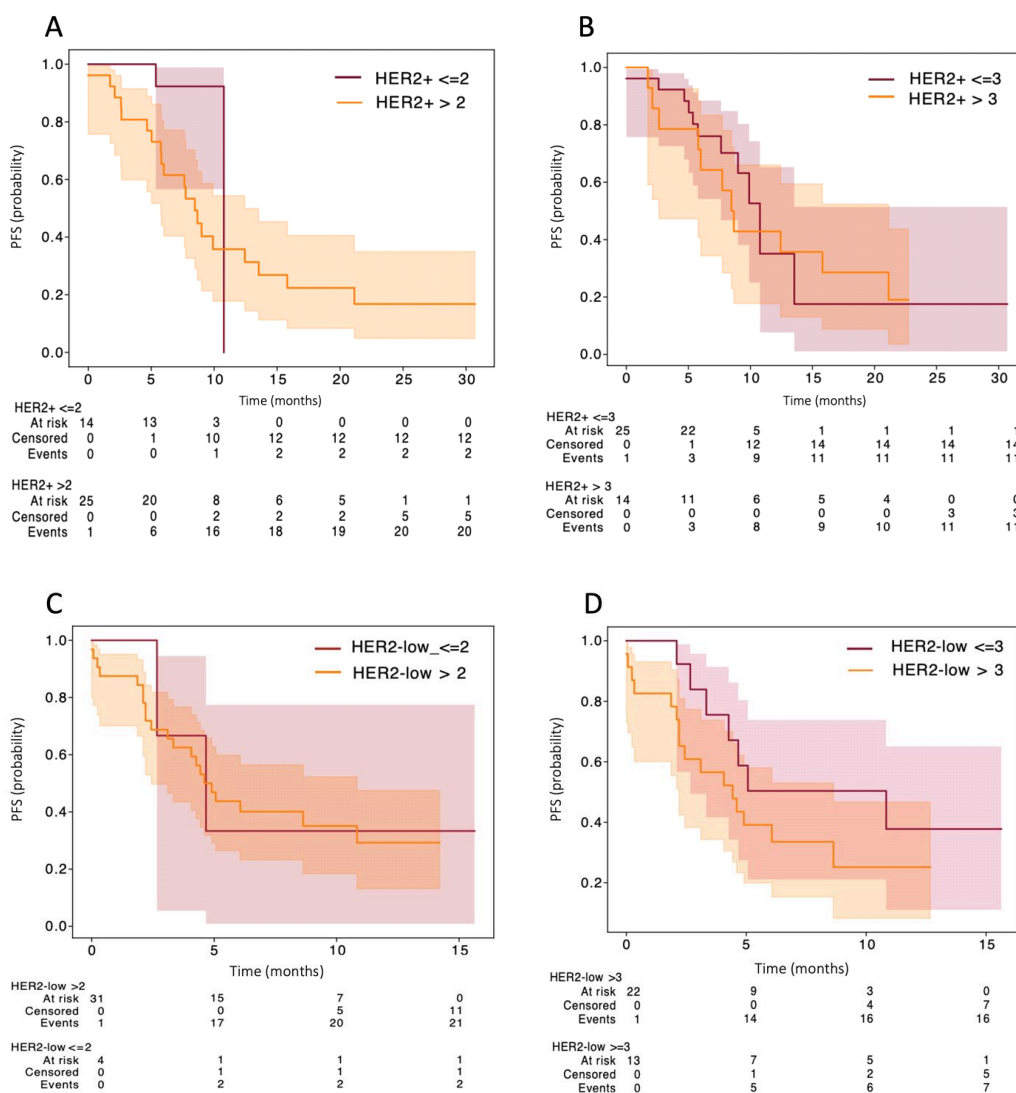

Suppl. Figure 2 –Real-world progression-free survival with T-DXd therapy stratified by therapy line: Panel A illustrates the rwPFS of all patients with HER2-low mBC treated with T-DXd segregated into those who received two or fewer prior therapies in the metastatic setting and those who received more than two prior therapies in the metastatic setting. Panel B illustrates the rwPFS of all patients with HER2-low mBC treated with T-DXd segregated into those who received three or fewer prior therapies in the metastatic setting and those who received more than three prior therapies in the metastatic setting. Panel C depicts the real-world PFS of all patients with HER2+ mBC treated with T-DXd up to the second therapy line versus beyond the second therapy line in the metastatic setting. Panel D depicts the real-world PFS of all patients with HER2+ mBC treated with T-DXd up to the third therapy line versus beyond the third therapy line in the metastatic setting.

Supplementary Material

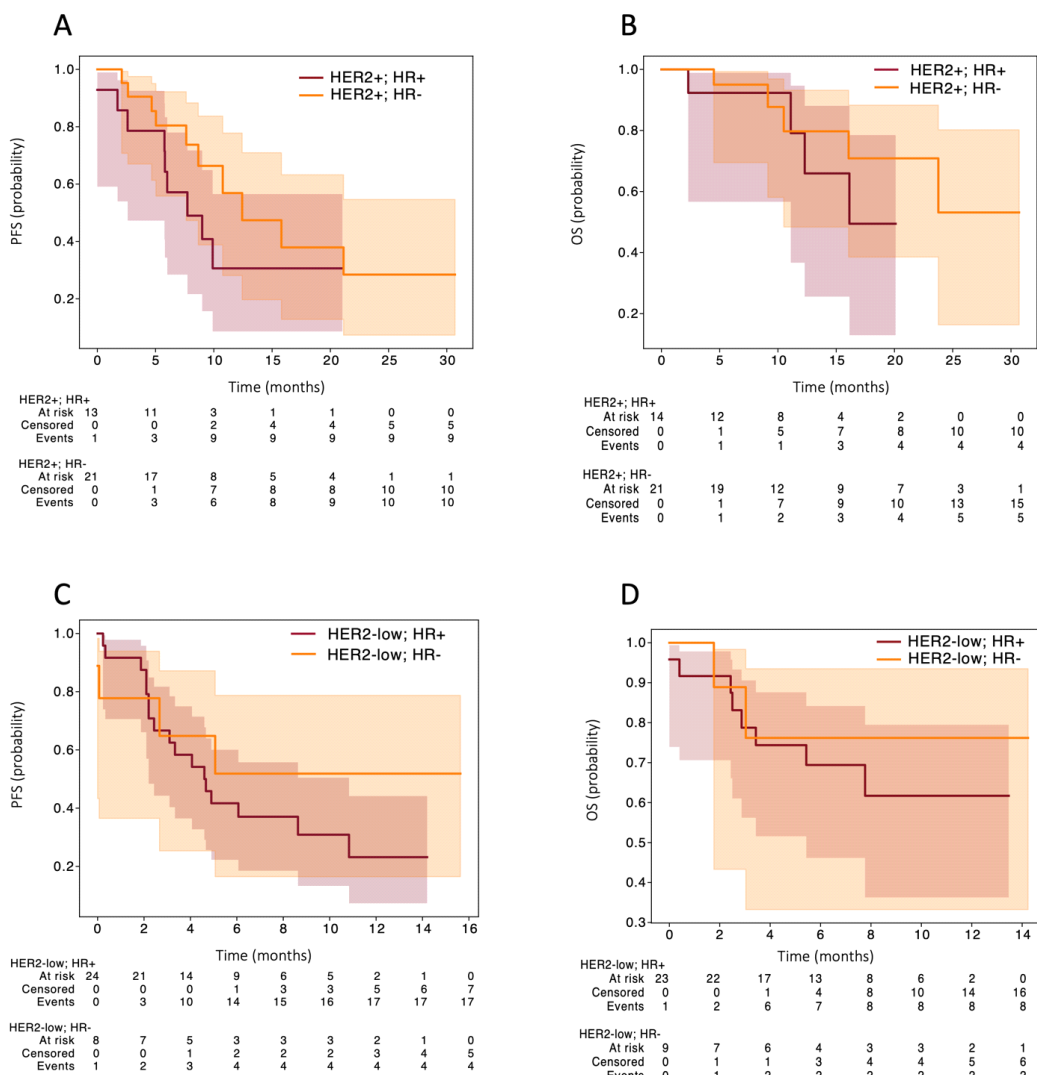

Suppl. Figure 3 –Real-world progression-free survival and real-world overall-survival with T-DXd therapy stratified by hormone receptor status.

## Supplementary Material

**Suppl. Table 3:**

| <b>HER2+ mBC treated with T-DXd</b>    | <b>HR+</b>     | <b>HR-</b>    | <b>p-value</b> |
|----------------------------------------|----------------|---------------|----------------|
| <b>Median rwPFS</b> in months (95% CI) | 7.7 (2.6-NE)   | 12.4 (7.6-NE) | 0.19           |
| <b>Median rwOS</b> in months (95% CI)  | 16.1 (11.1-NE) | Not reached   | 0.47           |
| <b>HER2-low mBC treated with T-DXd</b> | <b>HR+</b>     | <b>HR-</b>    | <b>p-value</b> |
| <b>Median rwPFS</b> in months (95% CI) | 4.6 (2.2-10.8) | NR            | 0.37           |
| <b>Median rwOS</b> in months (95% CI)  | NR             | NR            | 0.63           |

Suppl. Table 3 –: Real-world progression-free survival and real-world overall survival with T-DXd therapy stratified by hormone receptor status: NR: not reached; NE: not estimable.

## Supplementary Material

**Suppl. Table 4**

| Day | Medication                                           | Dose [mg/kg]       | Appl.        | Infusion Duration/<br>Dosage Plan/<br>Comments |
|-----|------------------------------------------------------|--------------------|--------------|------------------------------------------------|
|     | <b>Trastuzumab Deruxtecan (Enhertu)<br/>d1; q21d</b> |                    |              |                                                |
| 1   | Trastuzumab Deruxtecan                               | 5,4 mg/kg          | i.v.         | first dose 90'<br>from 2nd dose 30'*           |
| 1   | Dexamethasone<br>Netupitant/Palonosetron             | 8 mg<br>300/0,5 mg | p.o.<br>p.o. | 1-0-0<br>1-0-0                                 |
| 2   | Dexamethasone                                        | 4 mg               | p.o.         | 1-0-1                                          |

\*If well tolerated

**Dose Modifications:** Trastuzumab Deruxtecan: 5.4 mg/kg → 4.4 mg/kg → 3.2 mg/kg  
**G-CSF:** secondary prophylactic use of G-CSF

**Additional Diagnostics:**

Before Therapy - Echocardiography

Weekly: - Laboratory: Complete Blood Count

Before Cycle: - Laboratory: Complete Blood Count, Na+, K+, Ca2+, Creatinine, AST, ALT, γ-GT, Bilirubin

Every 3 Months – Echocardiography

**Suppl. Table 5:**

| Day  | Medication                                                            | Dose [mg/kg]                       | Appl.                        | Infusion Duration/<br>Dosage Plan/<br>Comments          |
|------|-----------------------------------------------------------------------|------------------------------------|------------------------------|---------------------------------------------------------|
|      | <b>Sacituzumab Govitecan (10 mg/kg)<br/>d1 d8, q21d</b>               |                                    |                              |                                                         |
| 1, 8 | Sacituzumab Govitecan                                                 | 10 mg/kg                           | i.v.                         | First dose 180'<br>2nd dose 120'*<br>from 3rd dose 60** |
| 1, 8 | Dexamethason<br>Dimetinden<br>Netupitant/Palonosetron<br>Dexamethason | 8 mg<br>4 mg<br>300/0,5 mg<br>4 mg | p.o.<br>i.v.<br>p.o.<br>p.o. | 1-0-0<br>1-0-0<br>1-0-0<br>0-0-1                        |

\*If well tolerated

**Dose Modifications:** Sacituzumab Govitecan: 10mg/kg → 7,5mg/kg → 5mg/kg

**G-CSF:** Preferably, primary prophylactic use of G-CSF. For example, with short-acting G-CSF on Days 2, 3, 4, 9, 10, 11, or with long-acting G-CSF on Day 9

**Additional diagnostics:**

Weekly: - Laboratory: Complete blood count

Before each cycle: - Laboratory: Complete blood count, Na+, K+, Ca2+, creatinine, GOT, GPT, γ-GT, bilirubin
